# Supplementary material for: Akt inhibition improves long‐term tumour control following radiotherapy by altering the microenvironment
Source: PubMed Central journal article supplement (PMC5709765; doi:10.15252/emmm.201707767), 2017-10-30
Supplement: EMMM-9-1646-s001.pdf [file EMMM-9-1646-s001.pdf]

## **Appendix**

- 1. Appendix figures S1-S5**
- 2. Appendix tables S1-S4**

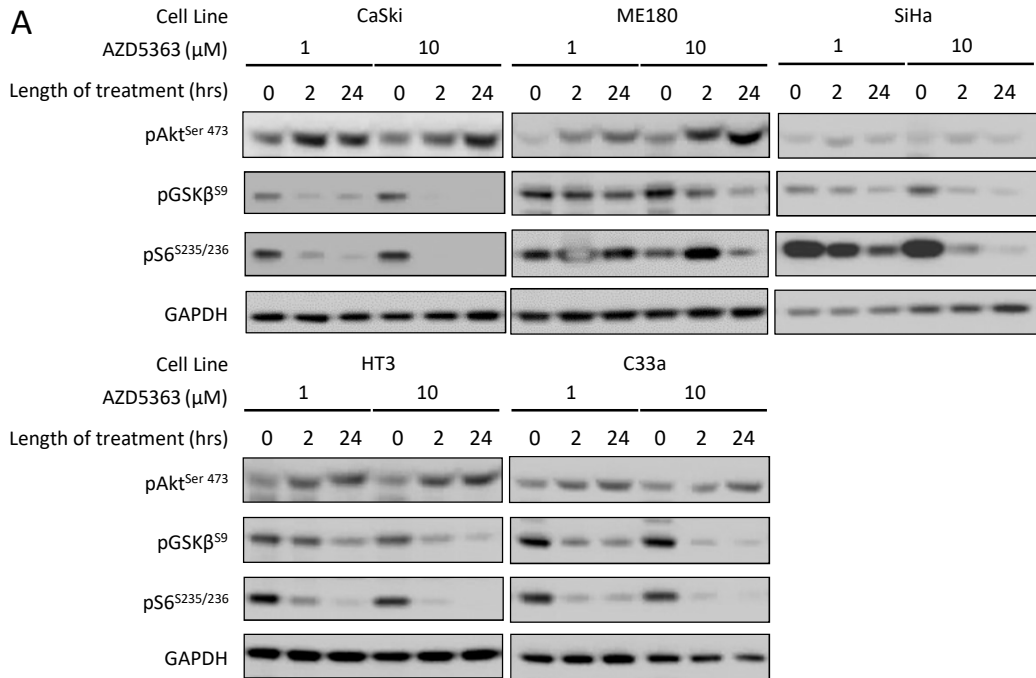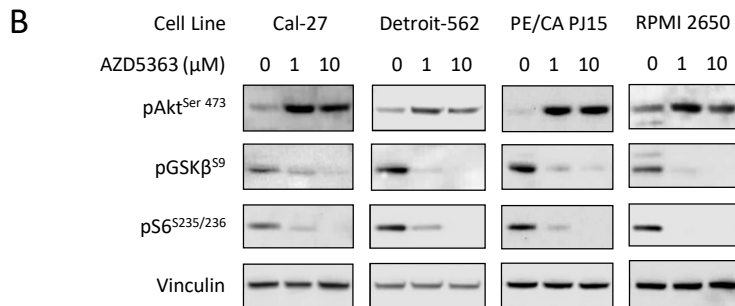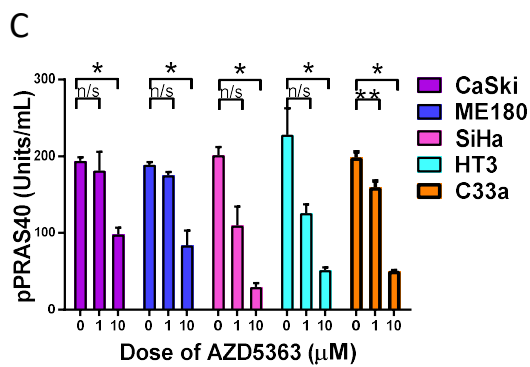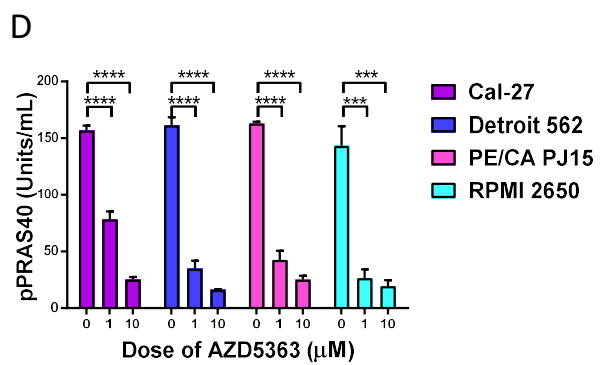

**Figure S1.**

**Akt inhibition with AZD5363 can be demonstrated in a wide range of cancer cells *in vitro*.**

**A-D.** Cells of differing origins were treated with 1  $\mu$ M or 10  $\mu$ M AZD5363 for 2 hours or 24 hours (A), or 2 hours only (B-D), before lysis on ice; ( $n = 3$  experiments). (A-B), Western blots were performed with antibodies detecting pAkt, pGSK3 $\beta$ , pS6 and the housekeeping protein GAPDH or vinculin. A representative is shown for each cell line, where (A) shows cells of a head and neck cancer origin, and (B), cells of a cervical cancer origin. (C-D), ELISA was used to measure levels of pPRAS40.

Data information: in (C) and (D) data is shown as mean  $\pm$  SEM; n/s  $P > 0.05$ , \*  $P < 0.05$ , \*\*  $P < 0.01$ , \*\*\*  $P < 0.001$ , \*\*\*\*  $P < 0.0001$ ). Statistical test is one-way ANOVA with Dunnett's *post hoc* test (for (C);  $P = 0.001$ -0.834, and for (D);  $P = 0.0001$ -0.0007).

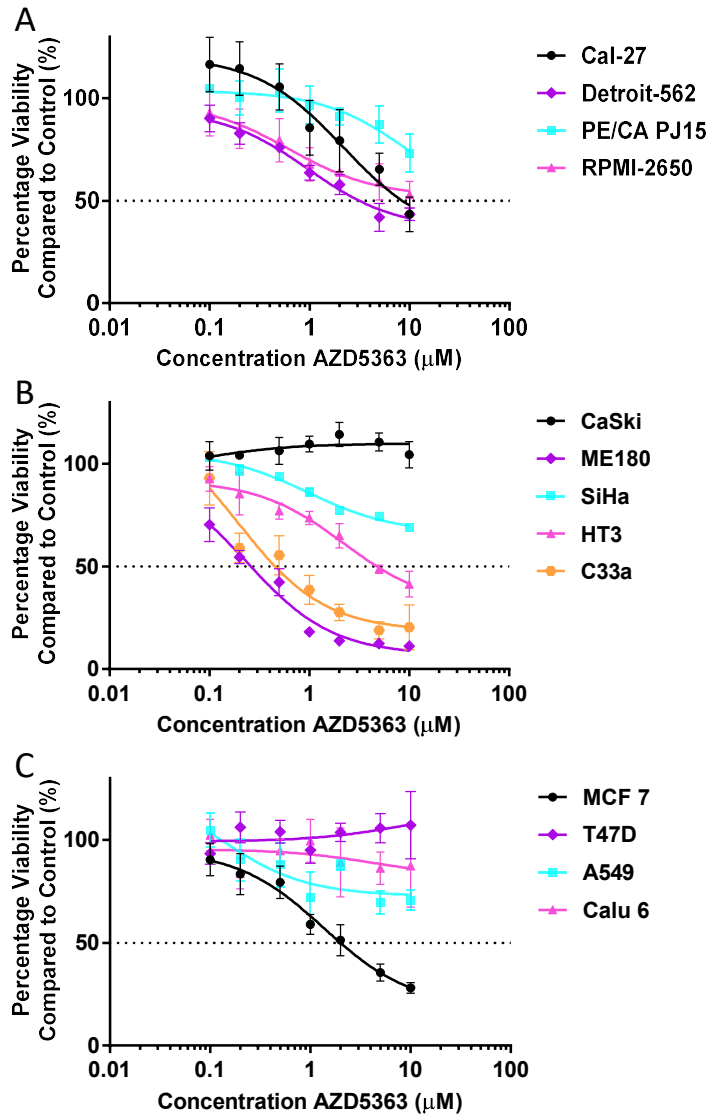

**Figure S2.**

**AZD5363 has a cell line dependent effect on viability *in vitro*.**

**A-C.** Cell lines of head and neck cancer (A), cervical cancer (B) and breast and lung cancer (C) origin, were treated with 1-10 $\mu\text{M}$  AZD5363 for 96hrs before an MTT assay was performed; ( $n = 3$  experiments).

Data information: Results are displayed as mean  $\pm$  SEM, normalised to a DMSO treated control and fitted to a dose-response curve.

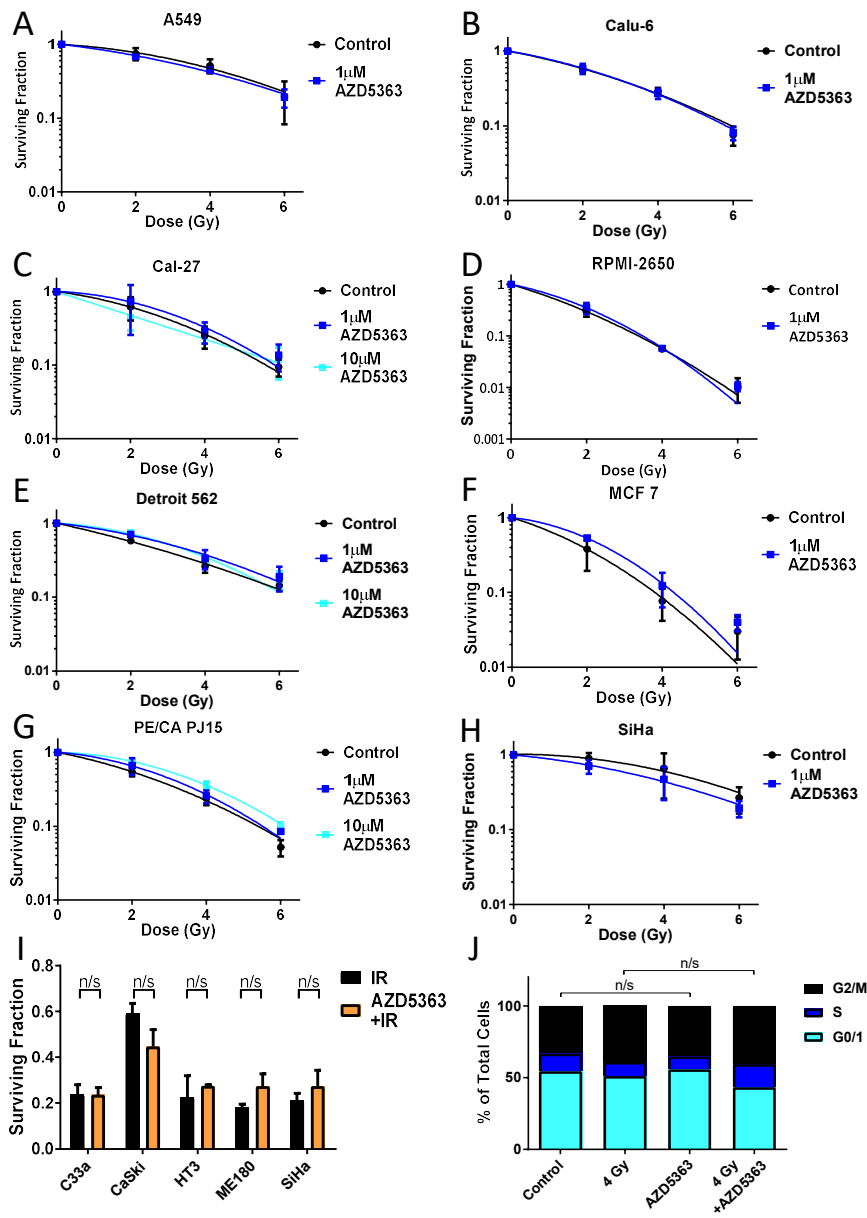

**Figure S3.**

**Akt inhibition with AZD5363 does not enhance the radiosensitivity of tumour cells *in vitro* and has no effect on the cell cycle of FaDu cells with or without radiation.**

**A-H.** Clonogenic assay of (A) A549, (B) Calu-6, (C) Cal-27, (D) RPMI-2650, (E) Detroit 562, (F) MCF 7, (G) PE/CA PJ15 and (H) SiHa cells treated with 1  $\mu$ M or 10  $\mu$ M AZD5363 for 2 hours before, and 24 hours after a single dose of RT (2, 4 or 6 Gy); ( $n = 3$  experiments).

**I.** Surviving fraction of cells of a cervical cancer origin after a single 4 Gy dose of RT combined with 10  $\mu$ M AZD5363; ( $n = 3$  experiments).

**J.** Flow cytometric analysis of FaDu cell cycle with propidium iodide which shows no effect of 24hrs 1  $\mu$ M AZD5363 either alone or after 4 Gy irradiation; ( $n = 3$  experiments).

Data information: In (A-H) values are shown of surviving fraction (mean  $\pm$  SEM) and are fitted to the linear quadratic model. In (I) values are of surviving fraction (mean  $\pm$  SEM). Statistical test is unpaired t-test, one per cell line, ( $P = 0.163-0.844$ ). In (J) stacked bars represent mean percentage total cells in each treatment group; n/s  $P > 0.05$ . Statistical test is Kruskal-Wallis with Dunn's *post hoc* test ( $P = > 0.9999$ ).

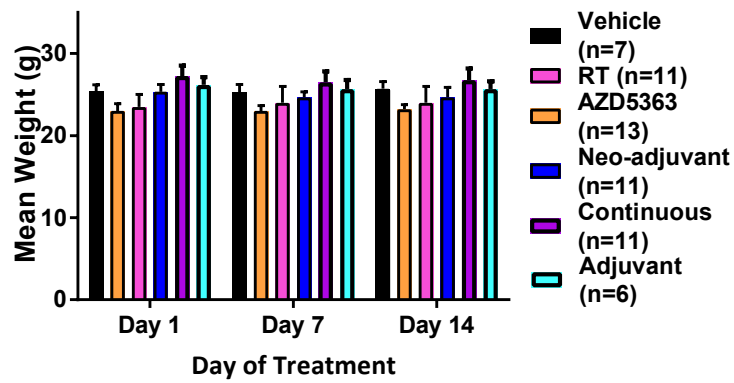

**Figure S4.**

**The combination of RT with AZD5363 does not cause loss of animal weight.**

**A.** Mean weights of FaDu tumour bearing mice treated with AZD5363 (50 mg/kg BD) or 6 Gy RT alone, or in combination, with the drug given as an adjuvant, continuously, or as a neo-adjuvant.

Data information: Plots show mean weights and are the combined data of 2 independent experiments; ( $n = 6-13$  mice/experiment).

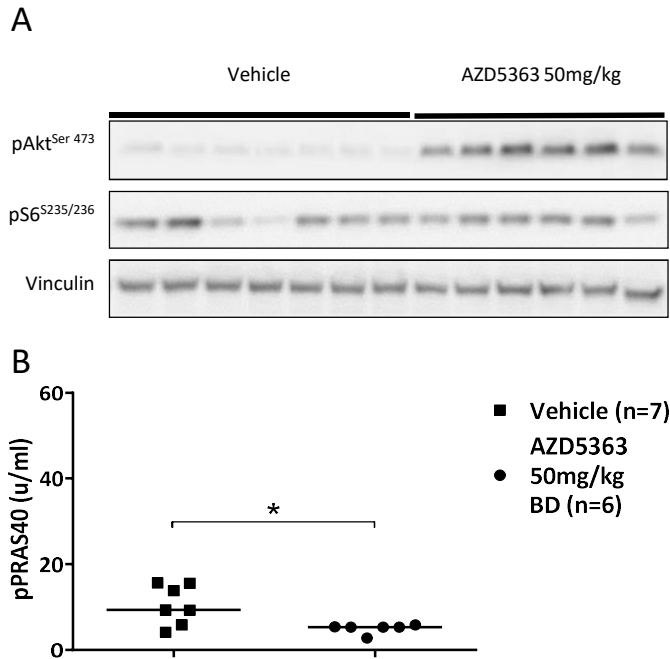

**Figure S5.**

**AZD5363 targets the Akt pathway when used *in vivo*.**

**A-B.** FaDu tumour bearing mice were treated with AZD5363 (50 mg/kg) for 7 days (14 doses) after which mice were culled and lysates prepared; ( $n = 6-7$  per group). (A), Western blot with antibodies detecting pAkt, pS6 and the housekeeping protein vinculin. (B), pPRAS40 levels as measured by ELISA; \*  $P < 0.05$ .

Data information: In (B) data shows individual results with line to represent median value. Statistical test is Mann-Whitney test (\*  $P = 0.032$ ).



Table S1- Cell lines and culture requirements

| Cell Line              | Origin                                 | Source    | Media                                              |
|------------------------|----------------------------------------|-----------|----------------------------------------------------|
| FaDu                   | H&N                                    | ATCC      | Advanced MEM<br>+10%FCS<br>+ 10ml 100x L-Glutamine |
| CAL-27                 | H&N                                    | ATCC      | DMEM<br>+10%FCS<br>+ 10ml 100x L-Glutamine         |
| Detroit-563            | H&N                                    | ATCC      | EMEM<br>+10%FCS<br>+ 10ml 100x L-Glutamine         |
| RPMI 2650              | H&N                                    | ATCC      | EMEM<br>+10%FCS<br>+ 10ml 100x L-Glutamine         |
| PE/CA PJ15             | H&N                                    | ECACC     | IMDM<br>+10%FCS<br>+ 10ml 100x L-Glutamine         |
| PE/CA PJ34 (Clone C12) | H&N                                    | ECACC     | IMDM<br>+10%FCS<br>+ 10ml 100x L-Glutamine         |
| ME-180                 | Cervical                               | ATCC      | DMEM<br>+10%FCS<br>+ 10ml 100x L-Glutamine         |
| Ca Ski                 | Cervical                               | ATCC      | RPMI-1640<br>+10%FCS<br>+ 10ml 100x L-Glutamine    |
| SiHa                   | Cervical                               | ATCC      | EMEM<br>+10%FCS<br>+ 10ml 100x L-Glutamine         |
| C-33 A                 | Cervical                               | ATCC      | EMEM<br>+10%FCS<br>+ 10ml 100x L-Glutamine         |
| HT3                    | Cervical                               | ATCC      | DMEM<br>+10%FCS<br>+ 10ml 100x L-Glutamine         |
| MCF7                   | Breast                                 | ATCC      | EMEM<br>+10%FCS<br>+ 10ml 100x L-Glutamine         |
| T-47D                  | Breast                                 | ATCC      | RPMI-1640<br>+10%FCS<br>+ 10ml 100x L-Glutamine    |
| A549                   | Lung                                   | ATCC      | F12<br>+10%FCS<br>+ 10ml 100x L-Glutamine          |
| Calu-6                 | Lung                                   | ATCC      | EMEM<br>+10%FCS<br>+ 10ml 100x L-Glutamine         |
| HUVEC                  | Human Umbilical Vein Endothelial Cells | Millipore | EndoGRO-LS Complete Culture Media Kit              |

Abbreviations: H&N, Head and Neck; FCS, Foetal Calf Serum; MEM, Minimum Essential Medium; DMEM, Dulbecco's Modified Eagle Medium; EMEM, Eagle's Minimum Essential Medium; IMDM, Iscove's Modified Dulbecco's Medium; RPMI-1640, Roswell Park Memorial Institute 1640 Medium; Suppliers: ATCC, American Type Culture Collection (Manassas, USA); ECACC, European Collection of Authenticated Cell Cultures (Salisbury, UK); Millipore (Watford, UK).

**Table S2- Antibodies used in Western blot analysis**

| <b>Antibody</b>                                  | <b>Supplier</b>                        | <b>Species</b> | <b>Size (kDa)</b> | <b>Dilution</b> |
|--------------------------------------------------|----------------------------------------|----------------|-------------------|-----------------|
| <b>Phospho-Akt (Ser473)</b>                      | Cell Signaling Technology, Denver, USA | Rabbit         | 66                | 1:500           |
| <b>Phospho-GSK3<math>\beta</math> (Ser9)</b>     | Cell Signaling Technology, Denver, USA | Rabbit         | 46                | 1:500           |
| <b>Phospho-S6 Ribosomal Protein (Ser235/236)</b> | Cell Signaling Technology, Denver, USA | Rabbit         | 32                | 1:1000          |
| <b>Vinculin</b>                                  | Sigma-Aldrich, Dorset, UK              | Mouse          | 116               | 1:5000          |
| <b>GAPDH</b>                                     | Sigma-Aldrich, Dorset, UK              | Rabbit         | 37                | 1:10000         |
| <b>Anti-rabbit IgG, HRP-linked Antibody</b>      | Cell Signaling Technology, Denver, USA | Goat           | N/A               | 1:2000          |
| <b>Anti-mouse IgG, HRP-linked Antibody</b>       | Cell Signaling Technology, Denver, USA | Horse          | N/A               | 1:2000          |

**Table S3- ELISA kits used**

| <b>ELISA Kit</b>                                        | <b>Supplier</b>              |
|---------------------------------------------------------|------------------------------|
| <b>PRAS40 (pT246)<br/>Phospho-ELISA Kit<br/>(Human)</b> | Invitrogen<br>(Paisley, UK). |
| <b>Human VEGF<br/>Quantikine® ELISA Kit</b>             | R&D<br>(Abingdon, UK)        |
| <b>Mouse VEGF<br/>Quantikine® ELISA Kit</b>             | R&D<br>(Abingdon, UK)        |

Table S4- Summary of Immunohistochemical staining techniques

| Stain                           | Antigen Retrieval                   | Blocking Steps                            | Primary Antibody (supplier*, dilution and incubation)                                   | Detection (supplier*)                         |
|---------------------------------|-------------------------------------|-------------------------------------------|-----------------------------------------------------------------------------------------|-----------------------------------------------|
| <b>CD31</b>                     | HIER (100°C, pH6, 20mins)           | EPB, 10mins<br>PPB, 30mins                | Anti-CD31 antibody, rabbit polyclonal (Abcam, 1:225, 15mins, RT)                        | NovoLink Polymer Refine Kit (Leica)           |
| <b>HIF-1<math>\alpha</math></b> | HIER (100°C, pH9, 40mins)           | EPB, 10mins<br>PPB, 30mins<br>BS, 30 mins | Anti-HIF-1-alpha antibody [EP1215Y], rabbit mAb (Abcam, 1:1000, 60mins, RT)             | NovoLink Polymer Refine Kit (Leica)           |
| <b>Human Ki-67</b>              | HIER (125°C 1min & 90°C 10sec, pH6) | EPB, 10mins<br>BR, 20mins                 | Monoclonal Mouse Anti-Human Ki-67 Antigen Clone MIB-1 (Dako, 1:100, 20mins, RT)         | ARK™ (Animal Research Kit) Peroxidase, (Dako) |
| <b>Pimonidazole</b>             | HIER (125°C 1min & 90°C 10sec, pH6) | EPB, 10mins<br>CB, 20mins                 | Affinity purified rabbit anti- pimonidazole antibody (Hydroxyprobe, 1:300, 120mins, RT) | EnVision-HRP Kit (Dako)                       |
| <b>CD11b</b>                    | HIER (pH6, 95°C 32mins)             | DI, 8mins                                 | Anti-CD11b antibody [EPR1344], rabbit mAb (Abcam, 1:4000, 40mins, 37°C)                 | DISCOVERY® OmniMap anti-Rabbit HRP (Ventana)  |
| <b>Mouse Ki-67</b>              | HIER (pH8.5, 95°C, 64 mins)         | DI, 8mins                                 | Ki-67, rabbit anti-mouse (Bethyl, 1:2000, 60mins, 37°C)                                 | DISCOVERY® OmniMap anti-Rabbit HRP (Ventana)  |

Abbreviations: HIER, Heat-induced Epitope Retrieval; EPB, Endogenous Peroxidase Block (3% H<sub>2</sub>O<sub>2</sub>, Sigma); PPB, Post Primary Block (Leica Refine Kit); BS, Blocking Solution (Candor); BR, Blocking Reagent (normal mouse serum, Dako); CB, 10% Casein Block (Vector); DI, Discovery Inhibitor (Ventana); RT, Room Temperature; mAb, monoclonal Antibody. \*Suppliers: Abcam (Cambridge, UK); Dako (Ely, UK); Vector Laboratories (Peterborough, UK); Leica, Leica Microsystems (Milton Keynes, UK); Ventana (Tucson, USA); Hydroxyprobe (Burlington, USA); Candor, (Candor Bioscience, Wangen, Germany); Sigma, Sigma-Aldrich (Dorset, UK); Dako (Ely, UK); Bethyl (Bethyl Laboratories, Montgomery, USA).
