# Supplementary material for: Akt inhibition improves long‐term tumour control following radiotherapy by altering the microenvironment
Source: PubMed Central journal article supplement (PMC5709765; doi:10.15252/emmm.201707767), 2017-10-30
Supplement: EMMM-9-1646-s002.pdf [file EMMM-9-1646-s002.pdf]

## Expanded View Figures

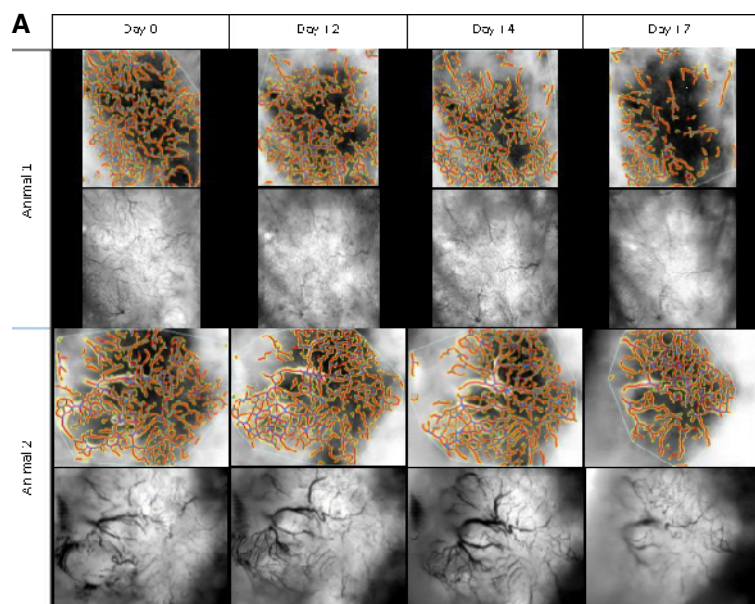

**Figure EV1. A reduction in total vessel length occurs 7 days post-RT in mice receiving adjuvant AZD5363.**

Two mice bearing FaDu tumours grown within dorsal windows were treated with 6 Gy RT and adjuvant AZD5363 (50 mg/kg BD), commencing on the first-day substantial tumour vasculature was visualised post-tumour inoculation (termed day 0).

- A Mice were imaged using bright-field microscopy on days 2, 4 and 7 following RT.
- B Total vessel length estimated with the assistance of computer software.

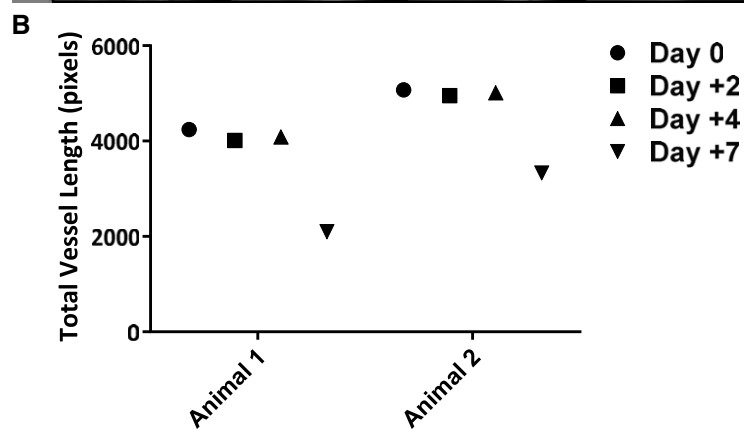

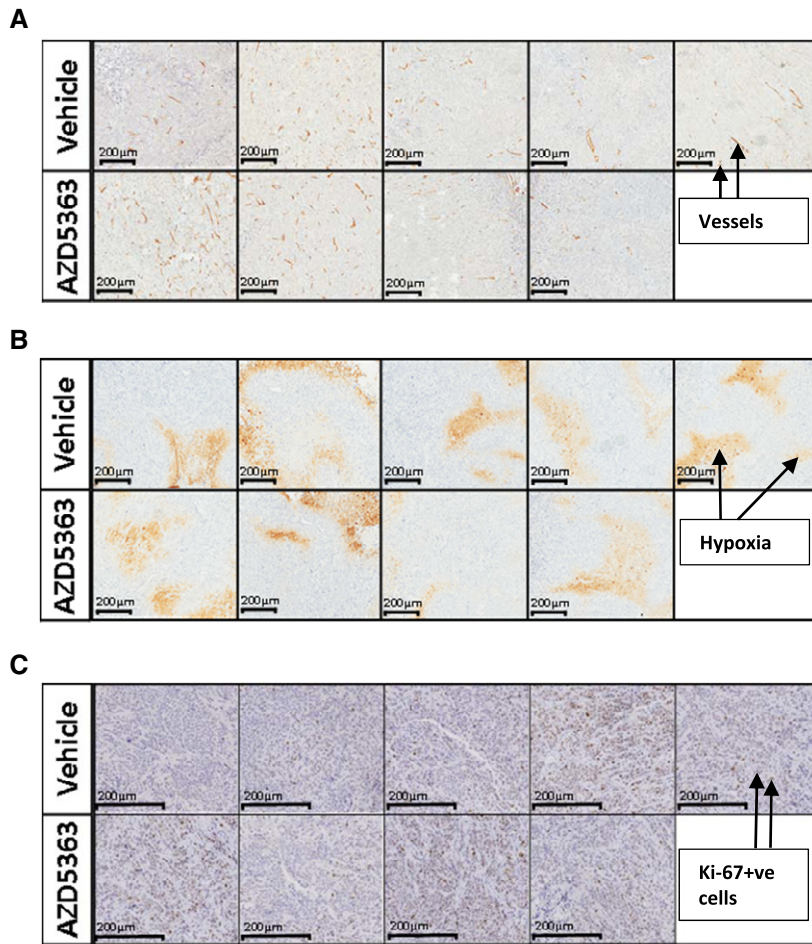

**Figure EV2. AZD5363 does not reduce vascularity, increase hypoxia or alter tumour cell proliferation when given as a single agent.**

FaDu tumour-bearing mice were treated with AZD5363 (50 mg/kg) for 7 days (14 doses) after which mice were culled and the tumours excised and prepared for histological analysis. Tumour sections were stained with antibodies to detect CD31, pimonidazole and Ki-67. Three sections were stained with each antibody, per tumour;  $n = 4-5/\text{group}$ .

- A CD31 staining to allow visualisation of tumour vessels, 10 $\times$  magnification.
- B Pimonidazole staining to allow estimation of tumour hypoxia, 10 $\times$  magnification.
- C Ki-67 staining to assess tumour cell proliferation, 10 $\times$  magnification.

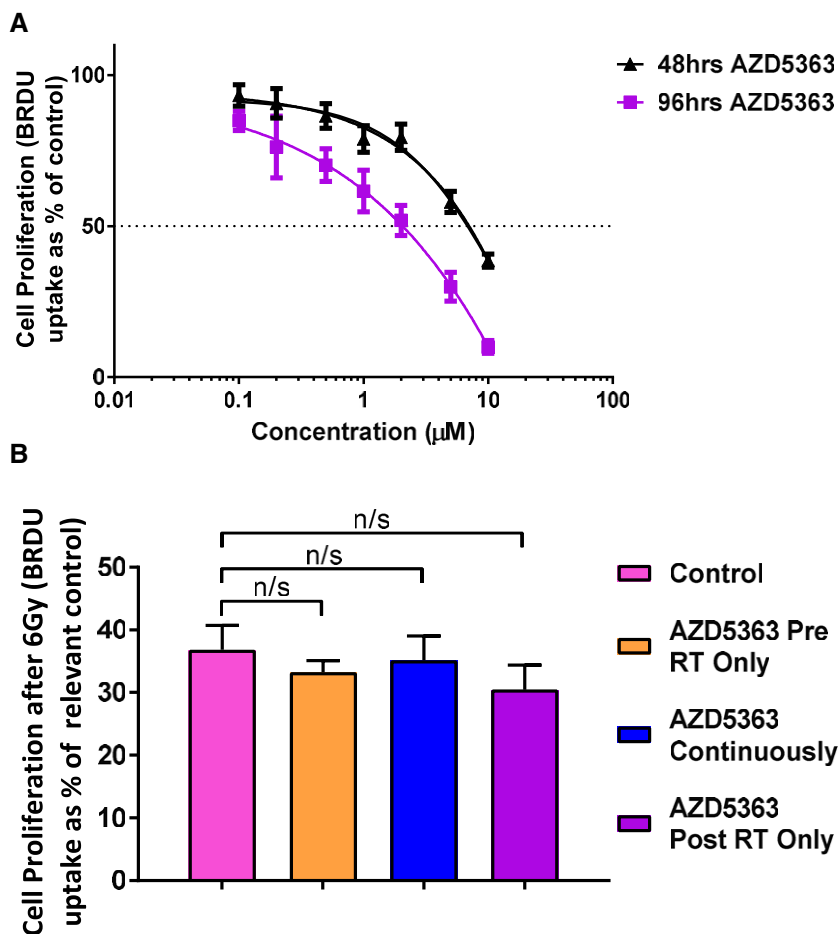

**Figure EV3. AZD5363 reduces human vascular endothelial cell proliferation but does not cause a greater than additive effect on proliferation after RT.**

A HUVEC cells (1,000 cells/well) were seeded in a gelatin-coated 96-well plate and treated with doses of AZD5363 ranging from 0.1 to 10  $\mu\text{M}$  for either 48 or 96 h. BrdU was added overnight, and an ELISA then performed to detect BrdU incorporation. A greater than 50% reduction in proliferation is produced with AZD5363 at a dose of between 2 and 3  $\mu\text{M}$  ( $n = 3$  experiments).

B A BrdU assay was performed as in (A) but with the addition of 1  $\mu\text{M}$  AZD5363 for 2 h before, 2 h before and 96 h after, or for 96 h after, a single 6-Gy dose of RT. None of the treatment schedules produced a greater than additive effect on the proliferation of vascular endothelial cells 96 h after a single 6-Gy dose of RT.

Data information: In (A) results are shown as the mean  $\pm$  SEM, normalised to DMSO-treated control data and fitted to a dose-response curve. In (B) data is shown as the mean  $\pm$  SEM, normalised to the relevant AZD5363 alone treated control; n/s =  $P > 0.05$ . Statistical test is Kruskal-Wallis with Dunn's *post hoc* test (adjusted  $P = 0.523$  to  $>0.9999$ ).
